# Supplementary material for: In Utero Exposure to Persistent Organic Pollutants and Childhood Lipid Levels
Source: Metabolites. 2021 Sep 28;11(10):657. doi: 10.3390/metabo11100657 (PMC8540619; doi:10.3390/metabo11100657)
Supplement: Supplementary file 1 [file metabolites-11-00657-s001.zip › Supplemental Tables_EI.pdf]

Table S1 - Pearson correlation coefficients and p-values for serum delivery and serum child organohalogen levels, GESTE Cohort.

|                    |         |          | Child Chemicals |             |             |                 |             |
|--------------------|---------|----------|-----------------|-------------|-------------|-----------------|-------------|
|                    |         |          | BDE 47          | BDE 100     | BDE 99      | BDE 153         | BDE 183     |
|                    |         |          |                 |             |             |                 |             |
| Delivery Chemicals | BDE 47  | <i>r</i> | 0.01            | 0.03        | 0.05        | 0.01            | -0.04       |
|                    |         | <i>P</i> | <i>0.95</i>     | <i>0.68</i> | <i>0.57</i> | <i>0.87</i>     | <i>0.61</i> |
|                    | BDE 100 | <i>r</i> | -0.04           | 0.04        | 0.03        | <b>0.24</b>     | -0.04       |
|                    |         | <i>P</i> | <i>0.67</i>     | <i>0.64</i> | <i>0.76</i> | <b>0.005</b>    | <i>0.62</i> |
|                    | BDE 99  | <i>r</i> | -0.10           | -0.08       | -0.08       | -0.01           | -0.03       |
|                    |         | <i>P</i> | <i>0.26</i>     | <i>0.36</i> | <i>0.35</i> | <i>0.89</i>     | <i>0.72</i> |
|                    | BDE 153 | <i>r</i> | 0.01            | 0.083       | 0.0752      | <b>0.34</b>     | -0.04       |
|                    |         | <i>P</i> | <i>0.93</i>     | <i>0.33</i> | <i>0.38</i> | <b>&lt;0001</b> | <i>0.66</i> |
|                    | PCB 138 | <i>r</i> | -0.04           | -0.024      | -0.05       | -0.03           | -0.06       |
|                    |         | <i>P</i> | <i>0.66</i>     | <i>0.78</i> | <i>0.58</i> | <i>0.75</i>     | <i>0.50</i> |
|                    | PCB 153 | <i>r</i> | -0.06           | -0.02       | -0.06       | -0.04           | -0.08       |
|                    |         | <i>P</i> | <i>0.51</i>     | <i>0.78</i> | <i>0.47</i> | <i>0.65</i>     | <i>0.35</i> |
|                    | PCB 180 | <i>r</i> | 0.04            | 0.10        | 0.02        | 0.12            | -0.09       |
|                    |         | <i>P</i> | <i>0.62</i>     | <i>0.25</i> | <i>0.78</i> | <i>0.15</i>     | <i>0.30</i> |

Abbreviations: PCB - polychlorinated biphenyl, BDE - brominated diphenyl ether, r - Pearson correlation statistic, P - P-value from Pearson correlation

N for analyses is 140 child-mother pairs.

Table S2: Relationship between Chemical Exposures Levels at 6-7 years and Child Lipid Levels at 6-7 years in the GESTE Cohort.

|                            | Chemical | Bivariate Model |         |      | Multivariate Model <sup>+</sup> |         |      |
|----------------------------|----------|-----------------|---------|------|---------------------------------|---------|------|
|                            |          | Beta            | SE      | P    | Beta                            | SE      | P    |
| Cholesterol <sup>a</sup>   | BDE 153  | 0.026           | (0.043) | **   | 0.028                           | (0.043) | **   |
|                            | BDE 47   | 0.027           | (0.022) | **   | 0.031                           | (0.022) | **   |
|                            | BDE 183  | 0.159           | (0.087) | 0.07 | 0.152                           | (0.087) | 0.08 |
|                            | BDE 100  | 0.024           | (0.043) | **   | 0.024                           | (0.042) | **   |
|                            | BDE 99   | 0.040           | (0.029) | **   | 0.045                           | (0.029) | **   |
| HDL <sup>b</sup>           | BDE 153  | -0.001          | (0.001) | **   | -0.001                          | (0.001) | **   |
|                            | BDE 47   | -0.030          | (0.014) | 0.04 | -0.030                          | (0.014) | 0.04 |
|                            | BDE 183  | 0.040           | (0.056) | **   | 0.038                           | (0.056) | **   |
|                            | BDE 100  | -0.061          | (0.027) | 0.02 | -0.062                          | (0.027) | 0.02 |
|                            | BDE 99   | -0.034          | (0.018) | 0.07 | -0.035                          | (0.018) | 0.06 |
| LDL <sup>a</sup>           | BDE 153  | 0.027           | (0.042) | **   | 0.031                           | (0.042) | **   |
|                            | BDE 47   | 0.040           | (0.022) | 0.07 | 0.044                           | (0.022) | 0.04 |
|                            | BDE 183  | 0.148           | (0.086) | 0.09 | 0.142                           | (0.085) | **   |
|                            | BDE 100  | 0.039           | (0.042) | **   | 0.041                           | (0.042) | **   |
|                            | BDE 99   | 0.056           | (0.028) | 0.05 | 0.062                           | (0.028) | 0.03 |
| Triglycerides <sup>b</sup> | BDE 153  | 0.005           | (0.031) | **   | 0.001                           | (0.031) | **   |
|                            | BDE 47   | 0.015           | (0.016) | **   | 0.014                           | (0.016) | **   |
|                            | BDE 183  | -0.016          | (0.062) | **   | -0.016                          | (0.062) | **   |
|                            | BDE 100  | 0.044           | (0.030) | **   | 0.041                           | (0.030) | **   |
|                            | BDE 99   | 0.007           | (0.021) | **   | 0.004                           | (0.021) | **   |
| Total lipids <sup>b</sup>  | BDE 153  | 0.004           | (0.011) | **   | 0.004                           | (0.011) | **   |
|                            | BDE 47   | 0.007           | (0.006) | **   | 0.008                           | (0.005) | **   |
|                            | BDE 183  | 0.028           | (0.022) | **   | 0.026                           | (0.022) | **   |
|                            | BDE 100  | 0.011           | (0.011) | **   | 0.011                           | (0.011) | **   |

|        |       |         |    |       |         |    |
|--------|-------|---------|----|-------|---------|----|
| BDE 99 | 0.008 | (0.007) | ** | 0.008 | (0.007) | ** |
|--------|-------|---------|----|-------|---------|----|

Abbreviations: SE - standard error, P - T-test P-value, HDL - high density lipoproteins, LDL - low density lipoproteins, PCB - polychlorinated biphenyl, BDE - brominated diphenyl ether, OH - organohalogens.

N=182

a Beta and SE from model using exposure untransformed and log transformed chemicals.

b Beta and SE from model using log transformed exposure and log transformed outcome.

\*\* P-value from T-test > 0.10.

+ Adjusted for mother's age during pregnancy and mother's body mass index after delivery.
